# Supplementary material for: Supramolecular Linear-Dendritic Nanoreactors: Synthesis and Catalytic Activity in “Green” Suzuki-Miyaura Reactions
Source: MDPI journal article supplement (doi:10.3390/polym15071671), 2023-03-28

## Supporting Information

### Supramolecular Linear-Dendritic Nanoreactors: Synthesis and Catalytic Activity in “Green” Suzuki-Miyaura Reactions

Xin Liu <sup>1,2</sup>, Francis Max Yavitt <sup>1,3</sup> and Ivan Gitsov <sup>1,4,\*</sup>

<sup>1</sup>Department of Chemistry, State University of New York - ESF, Syracuse, NY 13210; [xliu70@syr.edu](mailto:xliu70@syr.edu)

<sup>2</sup>State Grid Corporation Joint Laboratory of Advanced Electrical Engineering Materials (SDEPC), State Grid Shandong Electric Power Research Institute, Jinan 250001, China

<sup>3</sup>Department of Chemical and Biological Engineering, University of Colorado Boulder, Boulder, CO 80303; [francis.yavitt@colorado.edu](mailto:francis.yavitt@colorado.edu)

<sup>4</sup>The Michael M. Szwarc Polymer Research Institute, State University of New York, Syracuse, NY 13210; [igivanov@syr.edu](mailto:igivanov@syr.edu)

\*Correspondence: [igivanov@syr.edu](mailto:igivanov@syr.edu); Tel.: 1-315-470-6860

## CONTENTS

|                                                                                                                                                                   |    |
|-------------------------------------------------------------------------------------------------------------------------------------------------------------------|----|
| Scheme S1: Synthesis of 2,2-bis(propargyl) propionic acid (bis-PPA).....                                                                                          | S2 |
| Scheme S2: Synthesis of first generation poly(benzyl ether) dendron azide.....                                                                                    | S2 |
| Table S1: Molecular mass characteristics of initial PEGs, intermediates and final products in the synthesis of linear-dendritic copolymers.....                   | S3 |
| Figure S1: Schematic representation of micelle “stitching” and TEM images of individual [G-3]-PEG11k-[G-3] micelles and their interconnected supermolecules ..... | S4 |
| Figure S2: <sup>1</sup> H NMR spectra of 4-bromoacetophenone (A) and S-M coupling product with phenyl boronic acid (B).....                                       | S5 |

Scheme S1: Synthesis of 2,2-bis(propargyl) propionic acid (bis-PPA)

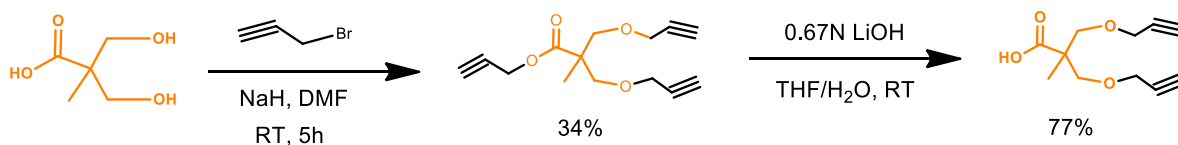

L. Wang, D.J. Kiemle, C.J. Boyle, E.L. Connors, I. Gitsov

“Click” Synthesis of Intrinsically Hydrophilic Dendrons and Dendrimers Containing Metal Binding Moieties at Each Branching Unit.

*Macromolecules* **47**(6), 2199-2213 (2014)

Scheme S2: Synthesis of first generation poly(benzyl ether) dendron azide

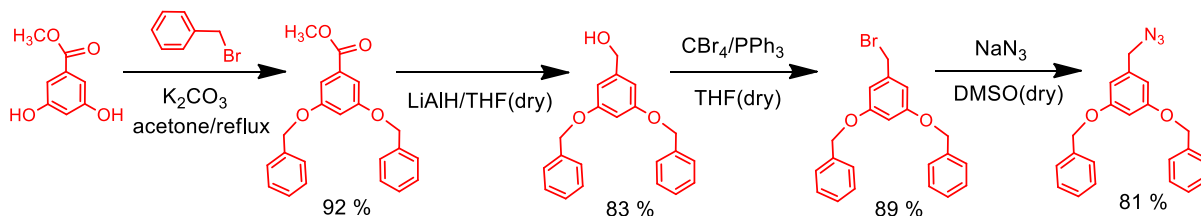

C. Hawker, J.M.J. Fréchet

A New Convergent Approach to Monodisperse Dendritic Macromolecules.

*J. Chem. Soc., Chem. Commun.* **1990**, 1010-1013.

Xin Liu, F. Max Yavitt, Ivan Gitsov

Supramolecular Linear-Dendritic Nanoreactors: Synthesis and Catalytic Activity in “Green” Suzuki-Miyaura Reactions

*Polymers* main text (2023)

Table S1: Molecular mass characteristics of initial PEGs, intermediates and final products in the synthesis of linear-dendritic copolymers

| Compound                                    | $M_p^{a)}$ | $M_n^{b)}$ | $M_w^{b)}$ | $\bar{D}^{c)}$ |
|---------------------------------------------|------------|------------|------------|----------------|
| <b>PEG5k</b>                                | 4210       | 4030       | 4140       | 1.03           |
| (alkyne)-PEG5k-(alkyne)                     | 4640       | 4500       | 4630       | 1.03           |
| (G1) <sub>2</sub> -PEG5k-(G1) <sub>2</sub>  | 5150       | 4950       | 5100       | 1.10           |
| (G2) <sub>2</sub> -PEG5k-(G2) <sub>2</sub>  | 6000       | 5710       | 6040       | 1.06           |
|                                             |            |            |            |                |
| <b>PEG11k</b>                               | 12200      | 9750       | 11800      | 1.21           |
| (alkyne)-PEG11k-(alkyne)                    | 12700      | 10600      | 13500      | 1.27           |
| (G2) <sub>2</sub> -PEG11k-(G2) <sub>2</sub> | 156000     | 11110      | 14150      | 1.27           |

<sup>a)</sup> Apparent molecular mass measured at the apex of the eluting peak, <sup>b)</sup> apparent molecular mass calculated against poly(styrene) calibration, <sup>c)</sup> polymer dispersity  $M_w/M_n$ .

Figure S1: Schematic representation of micelle “stitching” and TEM images of individual [G-3]-PEG11k-[G-3] micelles (a, scale bar 50 nm) and their interconnected supermolecules (b, scale bar 200 nm)

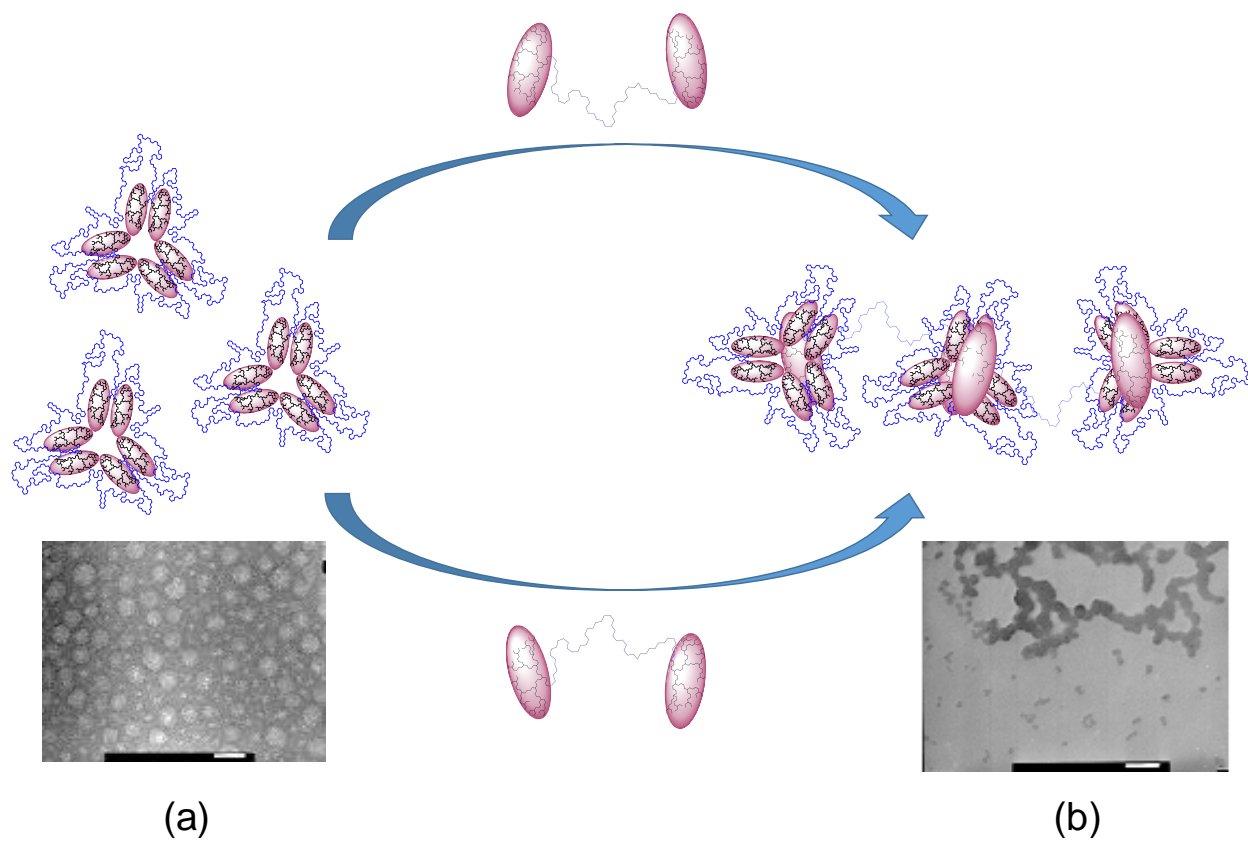

Figure S2:  $^1\text{H}$  NMR spectra of 4-bromoacetophenone (A) and S-M coupling product with phenyl boronic acid (B)

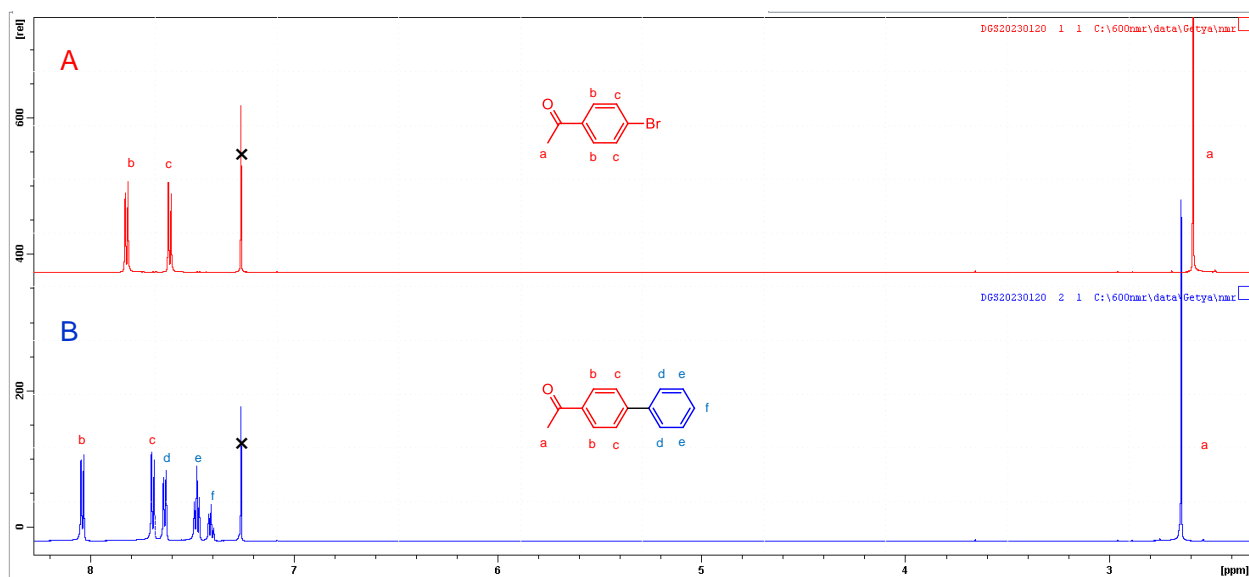

Supplement: s1 [file s1]
